# Supplementary material for: A Data Envelopment Analysis to Benchmark Hotel Energy Consumption in an Urban Locality
Source: Preprints.org preprint supplement (doi:10.20944/preprints202309.1476.v1), 2023-09-21
Supplement: Supplementary file 1 [file Authors%20profiles.pdf]

Chukwudi K. OKPALA holds a Bachelors degree (2010) in Mechanical Engineering from the University of Nigeria, Nsukka, where he is pursuing a Masters degree in Industrial Engineering and Management while working with the Sustainable Energy Engineering Research (SEER) Group as a volunteer researcher. He is a Microsoft Certified Data Analyst and a registered engineer with Council for the Regulation of Engineering in Nigeria (COREN). His impressive proficiency in a wide array of data analytics tools, including Microsoft Power BI, Tableau, SQL, and DAX, positions Chukwudi as a versatile and invaluable asset. Over the years, he has applied his expertise in the financial industry in Nigeria and is currently as a business intelligence analyst with Shersom Consulting Inc where he excels in developing clear and concise reporting systems that empower informed decision-making. His research mainly on Quality, Operations Management, Data Engineering, Operations Analysis, and Building Energy Efficiency.

Prof Howard NJOKU holds a PhD (2015) in Mechanical Engineering from the University of Nigeria, Nsukka, where he presently leads the Sustainable Energy Engineering Research (SEER) Group at the Department of Mechanical Engineering and coordinates Postgraduate Studies in the Faculty of Engineering. He teaches undergraduate and postgraduate courses in fluid mechanics, solid mechanics and thermodynamics. His research within the SEER Group encompasses the broad fields of thermo-fluids and energy engineering. His research is presently focused on thermoelectric waste heat recovery in thermal devices, carbon footprint mitigation, energy data analytics and indoor thermal comfort. Prof Njoku is a former Editor of the Nigerian Journal of Technology (NIJOTECH) and is an Area Editor of the EAI Transaction on Energy Web. He equally serves as a reviewer of numerous high-ranking scholarly journals. He has published 4 book chapters and over 60 peer-reviewed journal and conference articles.

Paul Amaechi AKO (formerly Ozor) holds a bachelor's degree in Mechanical/Production Engineering from the Enugu State University of Science and Technology as well as Master's and PhD degrees in Industrial Engineering and Management from the University of Nigeria, Nsukka. Dr Ako was Project Manager at a reputable Engineering company in Nigeria before joining the University of Nigeria, where he is presently the Head of the Department of Mechanical Engineering. Dr. Ozor is a global excellence stature fellow of the University of Johannesburg and is currently a Senior Research Associate at the University. He has published many peer-reviewed journal and conference proceedings articles. He is a member of the Nigeria Society of Engineers and registered with the Council for the Regulation of Engineering in Nigeria. His research interest is not limited to Asset Management, Quality, Operations Management, Reliability Engineering, Environmental Influence, Sustainable materials, Lean Six Sigma, and smart manufacturing.
