# Supplementary material for: A Data Envelopment Analysis to Benchmark Hotel Energy Consumption in an Urban Locality
Source: Preprints.org preprint supplement (doi:10.20944/preprints202309.1476.v1), 2023-09-21
Supplement: Supplementary file 2 [file conference%20CoverLetter%20for%20DEA%20paper.pdf]

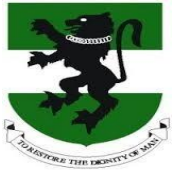

September 19, 2023

**Dear Editor**

*Engineering proceedings*

We are pleased to submit to you the attached draft paper titled "A Data Envelopment Analysis to Benchmark Hotel Energy Consumption in an Urban Locality" for your consideration for publication in your journal *Engineering proceedings*.

We will be presenting this paper at the 1<sup>st</sup> International Online Conference on Buildings (IOCBD) holding 24-26 October, 2023. We undertook the analysis on the basis of Nigeria's energy supply challenges, including inadequate power supply from the national grid. Hoteliers can benefit from this study as it explores a methodology for assessing energy losses, improving energy efficiency, and exploring alternative energy sources like solar and generators. Our submission also includes a benchmarking analysis of hotels of the same peer group in the University city of Nsukka, Nigeria using input-oriented data envelopment analysis (DEA) model to determine their energy efficiencies, capture their current energy costs and savings potentials.

This paper is being submitted to *Engineering proceedings* only. It has neither been published already in part or whole nor under consideration for publication or in press elsewhere. We hope that our paper will meet the very high standards of your journal, and expect to hear favourably from you soon.

We confirm that neither the manuscript nor any parts of its content are currently under consideration or published in another journal.

All authors have approved the manuscript and agree with its submission to *Engineering proceedings*.

Thanks once more.

A handwritten signature in black ink, appearing to read 'Chukwudi'.

**Chukwudi OKPALA** *Engr*

Sustainable Energy Engineering Research Group

Department of Mechanical Engineering

University of Nigeria, Nsukka 410001, Nigeria.

Phone: +234 (0)703 461 4368

Email: [chukwudi.okpala.pg79668 @ unn.edu.ng](mailto:chukwudi.okpala.pg79668@unn.edu.ng)
